# Supplementary material
Source: MDPI journal article supplement (https://www.mdpi.com/2227-9717/10/2/387)
Supplement: s1 [file s1]

Supplementary Material

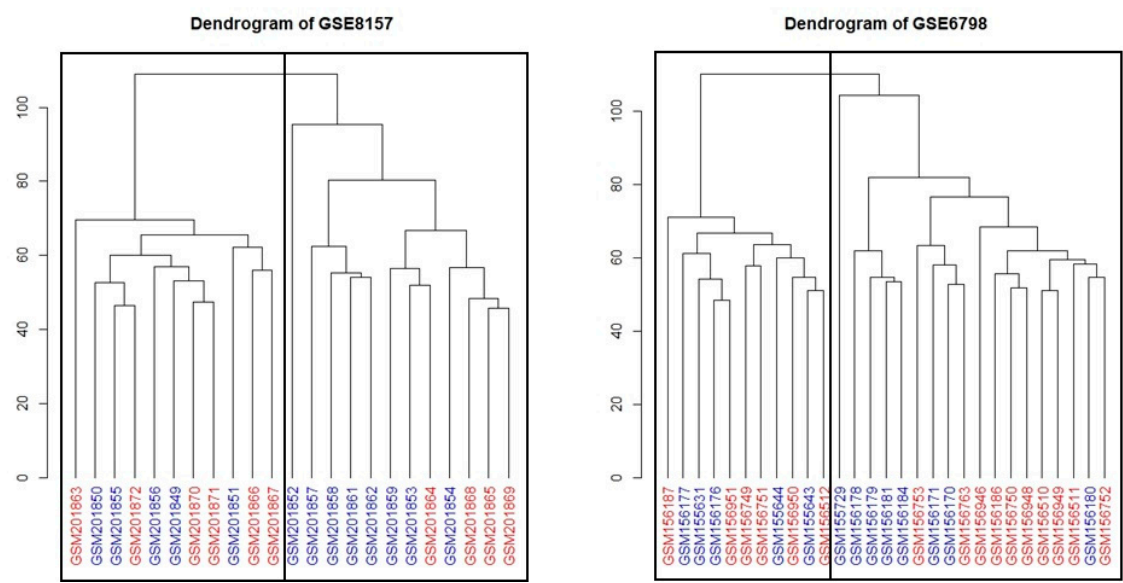

Figure S1. Dendrograms of GSE8157 and GSE679.

In each dendrogram, two clusters are determined by hierarchical clustering with complete linkage method. Blue color indicates controls, and the red one represents PCOS patients. PCOS; polycystic ovarian syndrome.

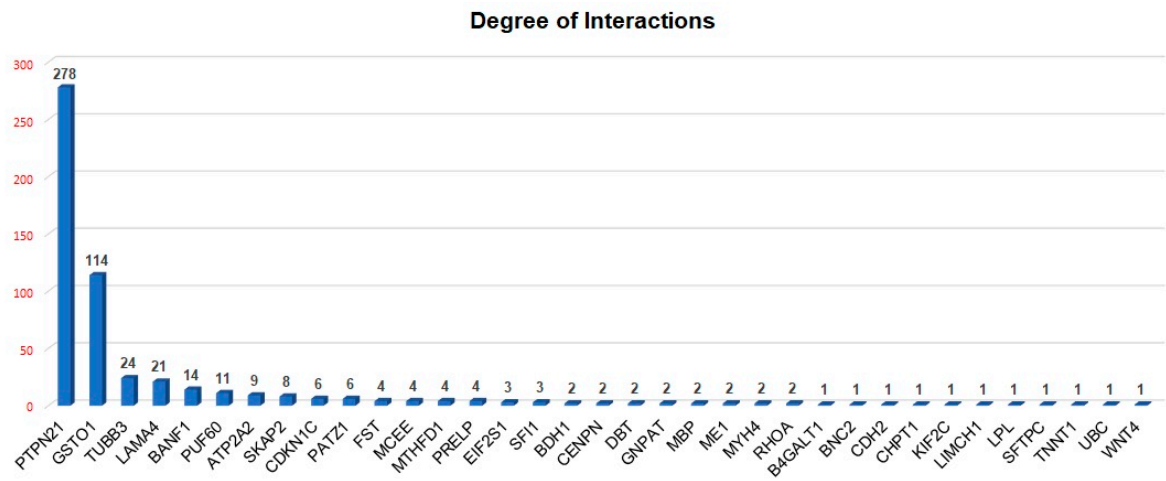

Figure S2. Number of differentially coexpressed genes per single gene.
